# Supplementary material for: Effect of pretreatment atmosphere on the activity and selectivity of Co/mesoHZSM-5 for Fischer–Tropsch synthesis
Source: Royal Society of Chemistry journal article supplement (doi:10.1039/c5nj02462e), 2015-12-09

Supplementary information

## Effect of pretreatment atmosphere on the activity and selectivity of Co/mesoHZSM-5 for Fischer-Tropsch Synthesis

Xiaohui Sun,<sup>a</sup> Sina Sartipi,<sup>a</sup> Freek Kapteijn<sup>a</sup> and Jorge Gascon<sup>\*a</sup>

a: Catalysis Engineering, Department of Chemical Engineering, Delft University of Technology, Julianalaan 136, 2628 BL Delft, The Netherlands. E-mail: [J.Gascon@tudelft.nl](mailto:J.Gascon@tudelft.nl); Fax: +31 15 27 89820.

**Fig. S1.** Mesopore size distribution of *meso*HZSM-5 support and Co/*meso*HZSM-5 catalysts pretreated at different conditions, calculated by DFT from the N<sub>2</sub> adsorption isotherm assuming a slit pore geometry (slit pore-N<sub>2</sub> DFT model).

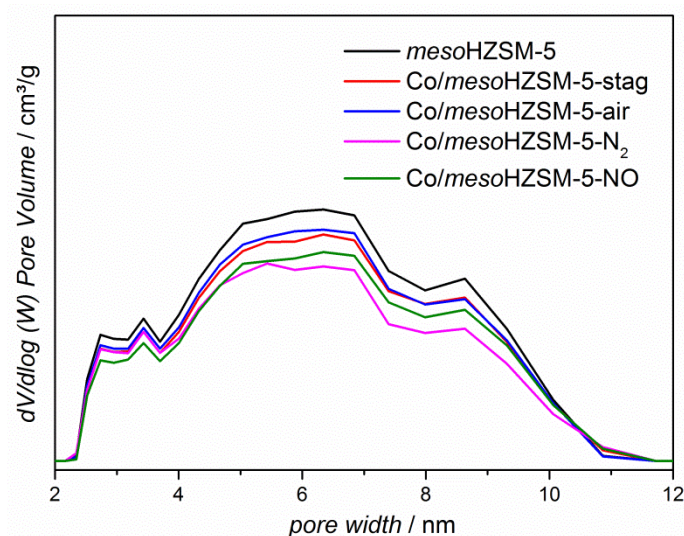

**Fig. S2.** TEM picture of Co/*meso*HZSM-5-N<sub>2</sub> particle

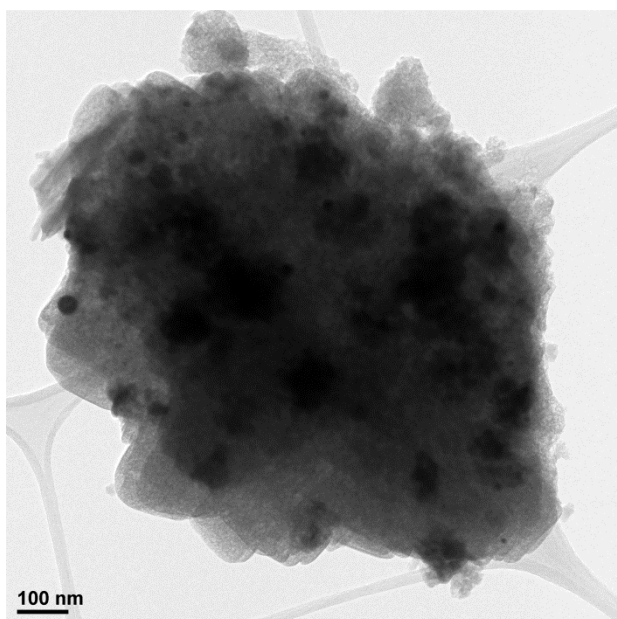

Supplement: c5nj02462e1.pdf [file c5nj02462e1.pdf]
